# Supplementary material for: Gas-fed photoelectrochemical reactions sustained by phosphotungstic acid as an inorganic surface electrolyte
Source: Royal Society of Chemistry journal article supplement (doi:10.1039/d3ya00568b), 2024-01-01
Supplement: d3ya00568b1.pdf [file d3ya00568b1.pdf]

Supporting Information

# Gas-fed Photoelectrochemical Reactions Sustained by Phosphotungstic Acid as an Inorganic Surface Electrolyte

*Fumiaki Amano*<sup>1\*</sup>, *Keisuke Tsushiro*<sup>1,2</sup>, *Chiho Akamoto*<sup>2</sup>

<sup>1</sup> Department of Applied Chemistry for Environment, Tokyo Metropolitan University, 1-1  
Minami-osawa, Hachioji, Tokyo 192-0397, Japan

<sup>2</sup> Department of Chemical and Environmental Engineering, The University of Kitakyushu, 1-1  
Hibikino, Wakamatsu-ku, Kitakyushu, Fukuoka 808-0135, Japan

\*Corresponding author

Fumiaki Amano: [f.amano@tmu.ac.jp](mailto:f.amano@tmu.ac.jp)

**Table S1.** Vapor-fed PEC water splitting at 1.2 V (vs. Pt-CB) under visible light for 20 h<sup>a</sup>

| Photoanode                        | IPCE (%) <sup>c</sup> | H <sub>2</sub> FE (%) <sup>d</sup> | O <sub>2</sub> FE (%) <sup>e</sup> |
|-----------------------------------|-----------------------|------------------------------------|------------------------------------|
| PFSA/WO <sub>3</sub> <sup>b</sup> | 2.4                   | 93.6                               | 84.8                               |
| PWA/WO <sub>3</sub> <sup>b</sup>  | 2.8                   | 99.4                               | 94.8                               |

<sup>a</sup> Wavelength 453 nm, Irradiance 12 mW cm<sup>-2</sup>, and area 16 cm<sup>2</sup>

<sup>b</sup> Surface electrolyte loading 5 wt%

<sup>c</sup> Incident photon-to-current conversion efficiency, which was calculated by subtracting the dark current from the current density just before the light is turned off.

<sup>d</sup> Faradaic efficiency of H<sub>2</sub> evolution on the cathode side

<sup>e</sup> Faradaic efficiency of O<sub>2</sub> evolution on the photoanode side

**Table S2.** SEM-EDS analysis of the functionalized WO<sub>3</sub> photoanodes before and after the long-term vapour-fed PEC water splitting at 1.2 V (vs. Pt-CB) under visible light for 20 h <sup>a</sup>

| Photoanode                        | Reaction | C<br>(mass%) | O<br>(mass%) | F<br>(mass%) | S<br>(mass%) | Ti<br>(mass%) | W<br>(mass%) |
|-----------------------------------|----------|--------------|--------------|--------------|--------------|---------------|--------------|
| PFSA/WO <sub>3</sub> <sup>b</sup> | Before   | 14.2         | 10.3         | 36.5         | 0.18         | 22.1          | 16.7         |
|                                   | After    | 9.3          | 17.5         | 18.5         | 0.13         | 21.8          | 32.8         |

| Photoanode                       | Reaction | O<br>(mass%) | P<br>(mass%) | Ti<br>(mass%) | W<br>(mass%) |
|----------------------------------|----------|--------------|--------------|---------------|--------------|
| PWA/WO <sub>3</sub> <sup>b</sup> | Before   | 29.0         | 0.29         | 25.8          | 44.9         |
|                                  | After    | 25.6         | 0.31         | 20.5          | 53.6         |

<sup>a</sup> Wavelength 453 nm, Irradiance 12 mW cm<sup>-2</sup>, and area 16 cm<sup>2</sup>

<sup>b</sup> Surface electrolyte loading 5 wt%

**Table S3.** Gas-phase PEC methane conversion at 1.2 V (vs. Pt-CB) under visible light irradiation (Fig.7) <sup>a</sup>

| Photoanode                        | IPCE (%) | H <sub>2</sub> FE (%) | FE in photoanode (%) |                               |                 |     |      | Selectivity (% , C-basis)     |                 |     |
|-----------------------------------|----------|-----------------------|----------------------|-------------------------------|-----------------|-----|------|-------------------------------|-----------------|-----|
|                                   |          |                       | O <sub>2</sub>       | C <sub>2</sub> H <sub>6</sub> | CO <sub>2</sub> | CO  | Sum  | C <sub>2</sub> H <sub>6</sub> | CO <sub>2</sub> | CO  |
| PFSA/WO <sub>3</sub> <sup>b</sup> | 6.3      | 99.5                  | 15.7                 | 8.6                           | 63.2            | 2.7 | 90.2 | 50.5                          | 46.7            | 2.8 |
| PWA/WO <sub>3</sub> <sup>c</sup>  | 7.1      | 101                   | 2.5                  | 10.5                          | 71.3            | 9.2 | 93.9 | 50.0                          | 42.3            | 7.6 |

<sup>a</sup> Wavelength 453 nm, Irradiance 22 mW cm<sup>-2</sup>, and area 2 cm<sup>2</sup>

<sup>b</sup> PFSA loading 12 wt%

<sup>c</sup> PWA loading 5 wt%

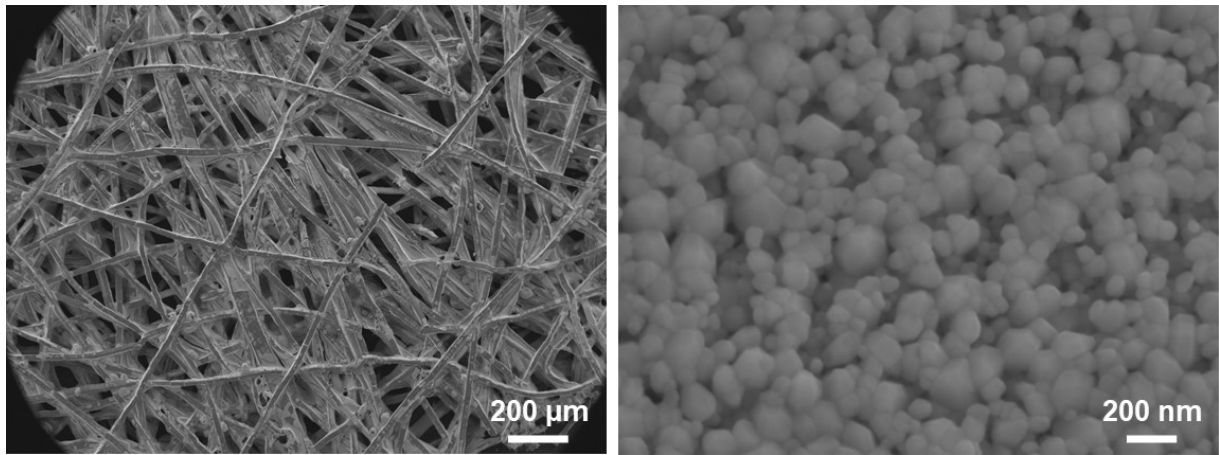

**Figure S1.** SEM images of the porous  $\text{WO}_3$  electrode functionalized by PWA coating (PWA/ $\text{WO}_3$ ).

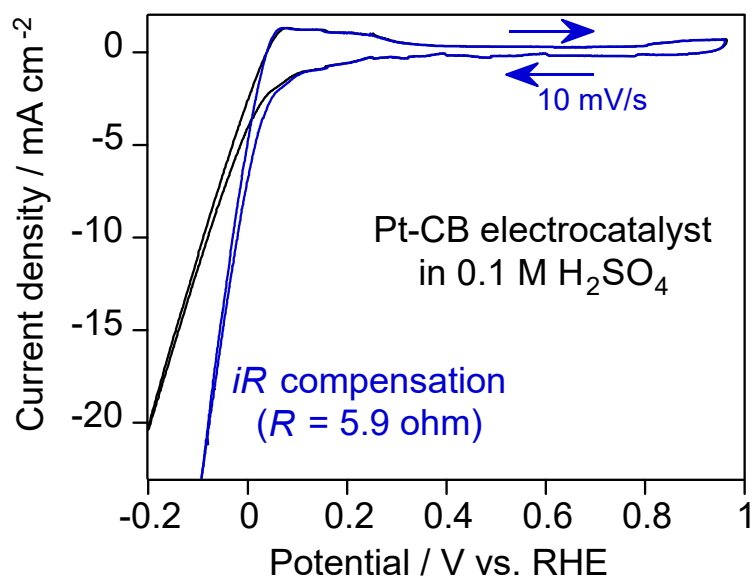

**Figure S2.** Cyclic voltammetry curves of the Pt-CB electrocatalyst in 0.1 M H<sub>2</sub>SO<sub>4</sub> electrolyte (pH 1.0) at a scan rate of 10 mV s<sup>-1</sup> with and without *iR* compensation. The series resistance between the working and reference electrodes was measured by electrochemical impedance spectroscopy analysis.

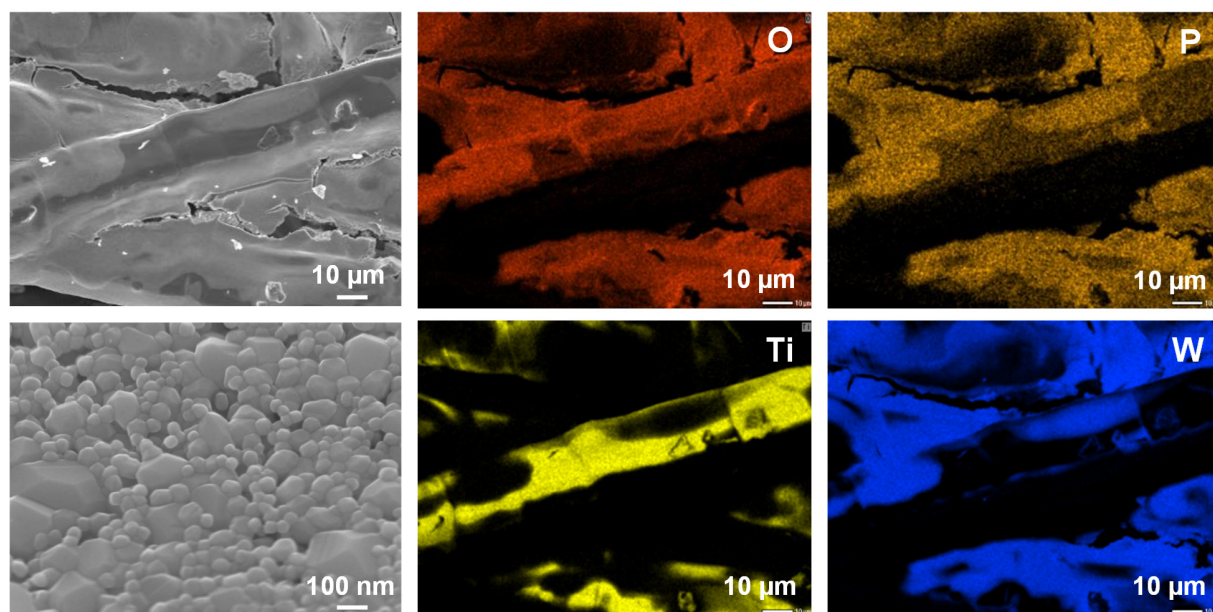

**Figure S3.** SEM-EDS mapping images of the PWA/WO<sub>3</sub> photoanode after the long-term vapour-fed PEC water splitting for 20 h.

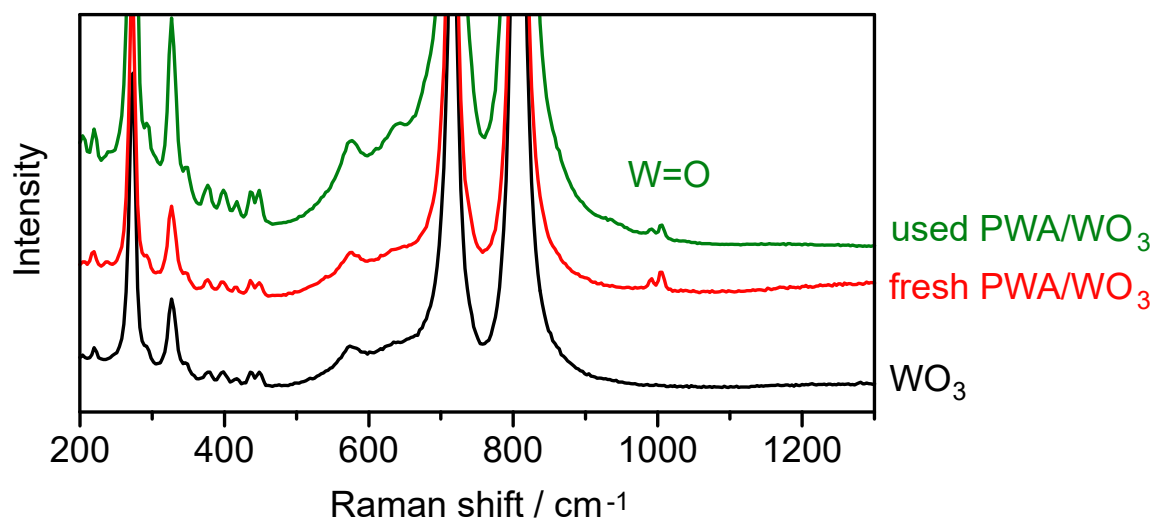

**Figure S4.** Raman spectra of (a) bare WO<sub>3</sub>, (b) PWA/WO<sub>3</sub>, and (c) PWA/WO<sub>3</sub> after the long-term vapor-fed PEC water splitting for 20 h.



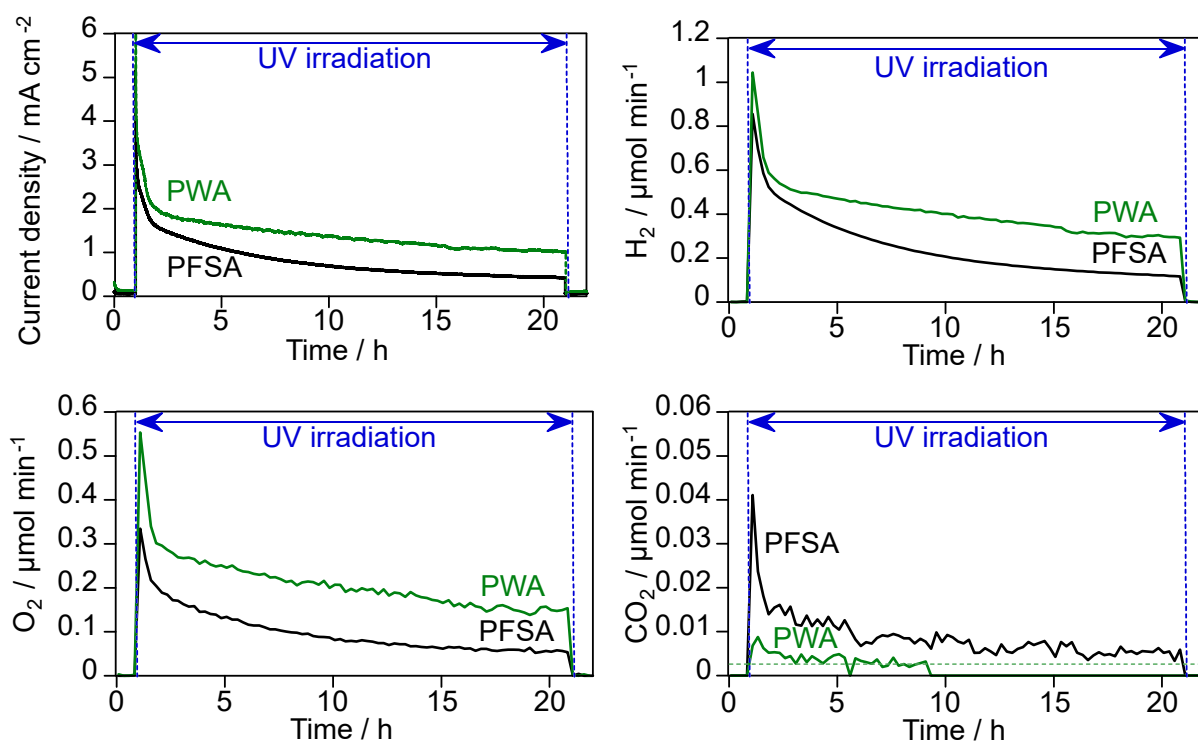

**Figure S5.** Vapour-fed PEC water splitting of PFSA/WO<sub>3</sub> and PWA/WO<sub>3</sub> photoanodes under UV light (wavelength 385 nm, irradiance 60 mW cm<sup>-2</sup>, irradiation area 2 cm<sup>2</sup>) at an applied voltage of 1.2 V (vs. Pt-CB cathode). Carrier gas: Ar, Flow rate: 20 mL min<sup>-1</sup>, Water vapour: 3 kPa, Temperature: 25 °C.
